# Supplementary material for: Hyperglycemia compromises Rat Cortical Bone by Increasing Osteocyte Lacunar Density and Decreasing Vascular Canal Volume
Source: PubMed Central journal article supplement (PMC6952406; doi:10.1038/s42003-019-0747-1), 2020-01-09
Supplement: 42003_2019_747_MOESM1_ESM.pdf [file 42003_2019_747_MOESM1_ESM.pdf]

## **Description of Additional Supplementary Files**

**File Name: Supplementary Data 1**

**Description: Source data**
